# Supplementary material
Source: Springer Nature journal article supplement (https://www.springermedizin.de/resource/supplementary/13058_2012_3155_MOESM2_ESM.pdf/9703408)
Supplement: MOESM2 [file 9703408]

### E-T-CMF group

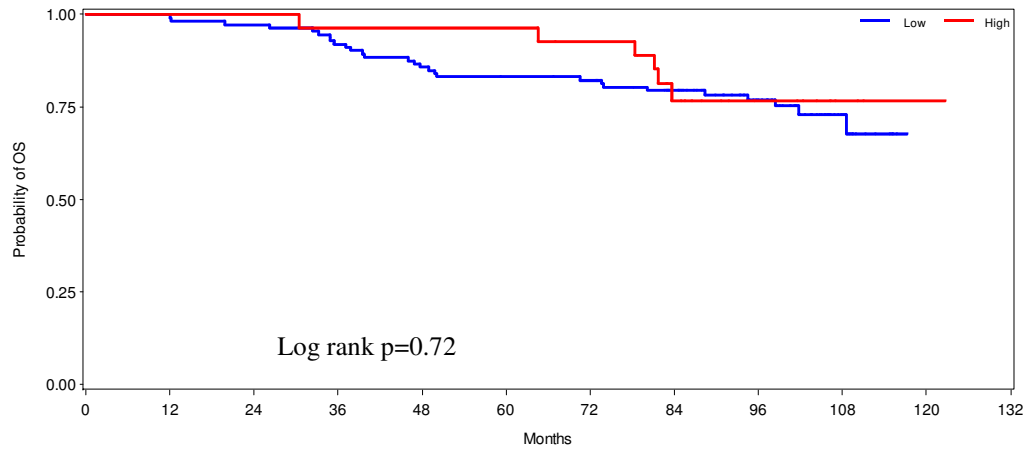

Patients at risk according to VEGF-C mRNA expression

|      |     |     |     |     |    |    |    |    |    |    |   |
|------|-----|-----|-----|-----|----|----|----|----|----|----|---|
| Low  | 113 | 113 | 110 | 104 | 97 | 93 | 91 | 78 | 50 | 16 | 1 |
| High | 28  | 28  | 28  | 27  | 27 | 27 | 25 | 15 | 8  | 3  | 1 |

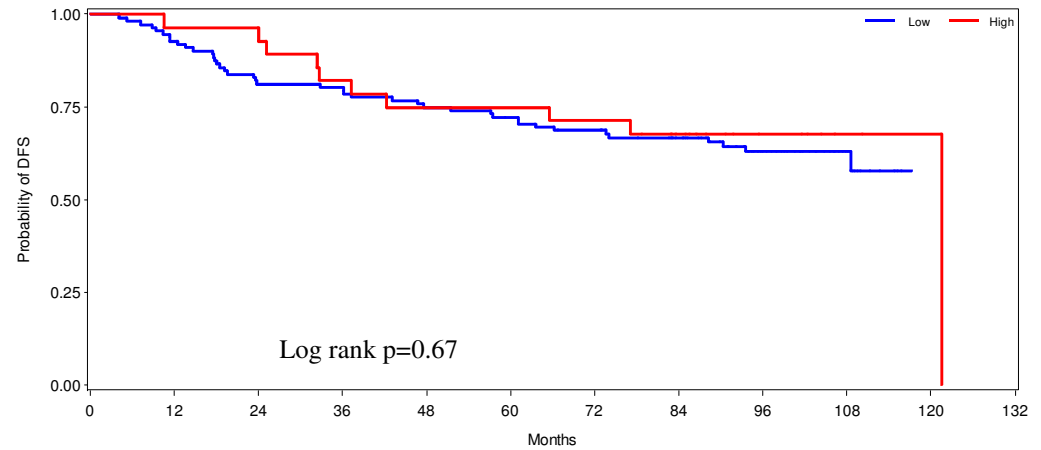

Patients at risk according to VEGF-C mRNA expression

|      |     |     |    |    |    |    |    |    |    |    |   |
|------|-----|-----|----|----|----|----|----|----|----|----|---|
| Low  | 113 | 104 | 91 | 90 | 84 | 80 | 75 | 64 | 37 | 14 | 1 |
| High | 28  | 27  | 26 | 23 | 21 | 21 | 20 | 13 | 6  | 2  | 1 |

### E-CMF group

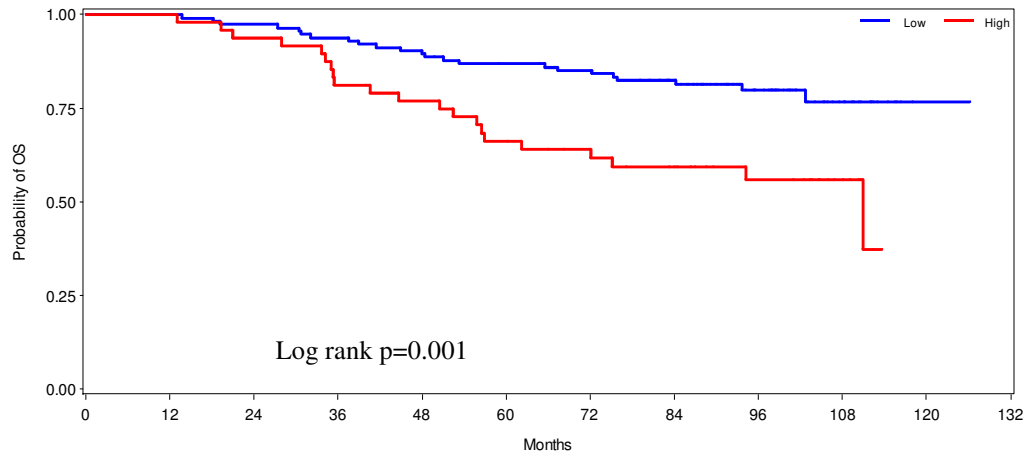

Patients at risk according to VEGF-C mRNA expression

|      |     |     |     |     |     |    |    |    |    |    |   |
|------|-----|-----|-----|-----|-----|----|----|----|----|----|---|
| Low  | 116 | 115 | 112 | 108 | 103 | 98 | 93 | 83 | 45 | 16 | 1 |
| High | 48  | 48  | 45  | 39  | 36  | 31 | 27 | 23 | 16 | 8  | 1 |

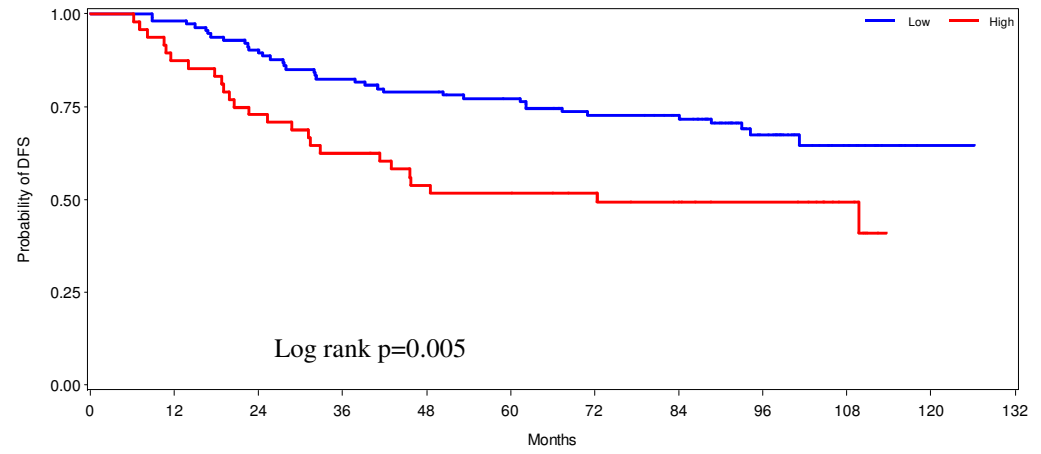

Patients at risk according to VEGF-C mRNA expression

|      |     |     |     |    |    |    |    |    |    |    |   |
|------|-----|-----|-----|----|----|----|----|----|----|----|---|
| Low  | 116 | 113 | 103 | 95 | 91 | 86 | 79 | 72 | 39 | 14 | 1 |
| High | 48  | 42  | 35  | 30 | 25 | 24 | 21 | 18 | 14 | 7  | 1 |
